# Supplementary material
Source: publisher figshare collection journal article supplement (https://acs.figshare.com/ndownloader/files/3807265)
Supplement: Supplementary file 1 [file 3807265]

92
3a-DFT singlet
Co	4.178151666750	2.198677811752	11.655345431386
Si	5.216409196897	0.477798803653	12.769842998798
N	5.654120306199	2.660460267665	10.380593922887
N	3.595500221642	0.927696052461	10.265383838067
N	5.008572910116	3.434711096914	12.972998420351
N	1.785526869983	2.861860766752	13.418645744285
N	1.766392841810	0.769030573814	12.906142245915
O	3.781562297149	3.855708974686	10.232284636381
O	5.102078383710	-0.540912400553	11.165643615142
O	5.395006656790	1.601664982507	14.288078541556
C	2.507367171706	1.919159779459	12.716222136499
C	0.661885917101	2.309407029460	14.024901052402
H	-0.014115351114	2.910416049496	14.611434892527
C	0.655391296843	0.999379741160	13.711297750460
H	-0.016289991635	0.201876763439	13.983778079283
C	2.009348070003	4.280574462170	13.582872914818
C	1.595690113008	5.168677058838	12.576138911959
C	1.740014267740	6.540100535761	12.822166515301
H	1.429772159780	7.240005362435	12.049195305997
C	2.243356987773	7.032774420209	14.028109080157
C	2.585711015776	6.114344137086	15.025958460631
H	2.950406702064	6.477944449985	15.984248254794
C	2.467169917073	4.735826500579	14.833638347027
C	2.776537727969	3.786659578697	15.969743194489
H	1.860357736366	3.491946782073	16.499298206523
H	3.435347070335	4.265957169393	16.699132261848
H	3.260284451961	2.868624453242	15.627796443446
C	2.417292043013	8.517180380926	14.250407583867
H	3.445019924305	8.832286269566	14.024982439469
H	2.215850393071	8.794454989152	15.291037219797
H	1.749886250240	9.100472325618	13.607499197694
C	0.987246946451	4.701508461800	11.276382619086
H	0.342469416265	5.482663295049	10.860319989830
H	0.381061263471	3.799684394193	11.412669563951
H	1.774256737068	4.477593638455	10.549350897549
C	1.966134132591	-0.579183655800	12.415581143182
C	3.026343222064	-1.353114586574	12.917250944368
C	3.082579646615	-2.699291567629	12.532976550365
H	3.899119972639	-3.308935094197	12.913399628340
C	2.138977654857	-3.273323560860	11.680023727443
C	1.107460052626	-2.463656134332	11.192517971643
H	0.368699916438	-2.887968486604	10.515806638162
C	0.996808839324	-1.116646016619	11.546400594226
C	-0.139883368649	-0.289585033105	10.986991117820
H	-0.541787514869	-0.762952071833	10.086283893065
H	0.186763777623	0.719723590587	10.719639477270
H	-0.969039638789	-0.184256536109	11.698388676907
C	2.247493469567	-4.721936537791	11.263277541752
H	1.260181550818	-5.172403108053	11.112582391590
H	2.781202658083	-5.315361445774	12.013019305591
H	2.797107056984	-4.820974414166	10.317561265468
C	4.103405789378	-0.744168779723	13.762272348939
H	4.734476189344	-1.533350876095	14.188582438947
H	3.686313239544	-0.176446122712	14.600986945690
C	7.077774046759	0.010872031477	12.853502551675
C	7.489124963662	-1.293591254066	12.507492191087
H	6.752326880748	-2.007195968615	12.151990557022
C	8.823582840728	-1.694140155580	12.596609466020
H	9.100721390082	-2.712180635243	12.331565393908
C	9.801587494731	-0.789397998516	13.013810846885
H	10.843441050549	-1.094811686039	13.075251998549
C	9.426516211724	0.511603418406	13.349609972870
H	10.177163398742	1.229242823836	13.673241314435
C	8.084859092558	0.896509235579	13.281287400359
H	7.830897438506	1.912730247284	13.564885863627
C	4.277369051523	-0.246999091638	10.207222909265
C	4.086134934224	-1.126496906439	9.112977652576
H	4.655314590877	-2.048731872773	9.094814656304
C	3.191599784823	-0.789020234010	8.117266786320
H	3.039502927247	-1.458212916756	7.273983488035
C	2.481214947567	0.420298610623	8.200298779648
H	1.774263466148	0.720951429058	7.434871996983
C	2.723929845926	1.245286329802	9.283755348028
H	2.247993312204	2.212607011139	9.387373573810
C	5.527335103001	2.884884617405	14.102888909661
C	6.209292073467	3.691415308341	15.047116300848
H	6.604185966370	3.210924584067	15.935164941196
C	6.378676302867	5.039157211771	14.793567070648
H	6.916930533714	5.662740195641	15.503276189582
C	5.858931338460	5.590241676147	13.612166020373
H	5.969155735107	6.642943148725	13.376903048366
C	5.180526044829	4.756248198032	12.742269462645
H	4.728120589562	5.122514607801	11.829606224194
C	4.947834359012	3.636374714764	9.732201036804
C	5.535855580745	4.301127612802	8.622389463675
H	4.966618298581	5.072401675567	8.113831077462
C	6.810899025142	3.939213697191	8.226856898383
H	7.274767861988	4.439235034495	7.379252458330
C	7.511955277248	2.929185536888	8.911174860199
H	8.512044229394	2.631174130413	8.616533543757
C	6.887983862499	2.311516583727	9.984983949348
H	7.371934914883	1.523290528183	10.553366482218
92
[3a-DFT]+ doublet
Co	3.936480412108	2.484754062660	11.494325901519
Si	5.557122074031	0.002739983478	13.053959966447
N	5.249793229675	3.146231222771	10.127481389250
N	3.637329544810	0.994370819833	10.229116541370
N	4.986366285616	3.556256560166	12.818925189335
N	1.757618572681	2.915756042115	13.531750174586
N	1.859135908813	0.814749431015	13.060835675113
O	3.216427485394	4.044569118390	10.150659390335
O	5.405187903513	0.077815893743	11.384343388806
O	5.416775497821	1.518961931645	13.756865477580
C	2.430248471311	2.026296464854	12.734333475338
C	0.810857517740	2.281556134146	14.327576508539
H	0.185891648355	2.834117378957	15.011053887664
C	0.874598386089	0.964704822054	14.036629676036
H	0.321594702396	0.119495679113	14.414832214826
C	1.891467652419	4.356763649110	13.582704694915
C	1.236732938442	5.139836884358	12.614602553207
C	1.335922993767	6.529936861494	12.734273119311
H	0.842328830775	7.150016325073	11.989546459917
C	2.026561766309	7.142965293798	13.785418664957
C	2.624745949794	6.324994069380	14.748719056180
H	3.148604022895	6.781785111563	15.585341935371
C	2.559430850617	4.929371198768	14.678378802014
C	3.165938550199	4.092506087955	15.781805974953
H	2.418163320531	3.840199461063	16.545273300669
H	3.966105281694	4.642227147238	16.286120043819
H	3.577456558576	3.149563213906	15.412212635115
C	2.083183162892	8.648595114562	13.896425645727
H	2.258387561933	9.116100508600	12.921388792412
H	2.876121475377	8.972477888954	14.577655323547
H	1.136466605212	9.049830960431	14.280365571354
C	0.433066213209	4.537120878780	11.487969006699
H	-0.298917918753	5.261303997140	11.118101061093
H	-0.112706918032	3.643094706365	11.808382649890
H	1.092240151707	4.264196145618	10.658309681423
C	2.030494613748	-0.490649270608	12.456475773368
C	3.048781200319	-1.354649019621	12.891392744723
C	3.078609853189	-2.656567268478	12.371527843823
H	3.857801855423	-3.335286578661	12.711860919622
C	2.131334903680	-3.111648977045	11.452784844096
C	1.135398251607	-2.219056305964	11.037669074295
H	0.389370539969	-2.550982270648	10.319359623018
C	1.055411367893	-0.914850959749	11.530580949127
C	-0.061683179465	-0.002850992931	11.079591627910
H	-0.566742034754	-0.418960053696	10.203740278455
H	0.305482508327	0.995804963960	10.821420947624
H	-0.817813229092	0.128791865055	11.863170963552
C	2.159396668090	-4.530577390322	10.936964644148
H	1.359034894477	-5.128484573766	11.390768028367
H	3.108839303744	-5.024115228563	11.165115308857
H	2.008819356715	-4.564730051415	9.852161917451
C	4.121965432385	-0.921365696920	13.862322055828
H	4.526859879925	-1.802789072489	14.373121879841
H	3.714676512697	-0.261415008467	14.636705905591
C	7.263245422499	-0.655156370150	13.354914890447
C	8.088390282303	-1.114465189076	12.311637826769
H	7.735422414506	-1.071601761972	11.285039991114
C	9.363187577189	-1.617367494809	12.577303955708
H	9.989112892400	-1.964903414645	11.760219331276
C	9.833113761183	-1.673207785380	13.890687302953
H	10.824525301891	-2.066485379584	14.096961034502
C	9.028322152385	-1.223302534470	14.940877944122
H	9.392486975001	-1.266548036260	15.963436362581
C	7.756159303926	-0.718234735599	14.674983671140
H	7.145041054474	-0.370497981734	15.506467210290
C	4.527069664761	-0.000986039325	10.356332264809
C	4.631002483228	-1.032521366578	9.421719304585
H	5.369295987896	-1.812508063350	9.566391738464
C	3.784551379677	-1.008819910186	8.318351031779
H	3.848577945242	-1.793289963734	7.570314079664
C	2.867766235023	0.037009537679	8.175230374823
H	2.206109536675	0.096398690057	7.318370917271
C	2.828785704701	1.021800012456	9.151414406867
H	2.172639920753	1.882319074869	9.088768551726
C	5.765237523055	2.815479152042	13.623095947839
C	6.821761310986	3.357886975374	14.358214845248
H	7.418991794966	2.711342700018	14.990584005564
C	7.066305558436	4.722616402213	14.244315980603
H	7.883194589552	5.175108638790	14.798532185255
C	6.250276645754	5.500926642458	13.417308035823
H	6.407105557740	6.568290510944	13.310527362423
C	5.227242724051	4.879103574025	12.716452174334
H	4.564534673325	5.420852063408	12.051600903880
C	4.363347721308	4.030093401758	9.568909474633
C	4.775467739267	4.813825290080	8.456795158664
H	4.070566814802	5.511139983351	8.017060491842
C	6.061677468956	4.660977711047	7.974029140725
H	6.391445239333	5.254838973596	7.125199287941
C	6.951355211715	3.743139684814	8.569514265132
H	7.962778813492	3.614151927545	8.201413444249
C	6.497001178388	3.003211173218	9.647332152882
H	7.129499050383	2.274800748340	10.149718793035
92
[3a-DFT]+ quartet
Co 3.771883 2.409045 11.376472
Si 5.432429 -0.187876 13.430122
N 4.813941 4.014888 8.996727
N 4.399719 0.698314 10.250503
N 5.479468 3.156008 12.346322
N 1.736710 2.890045 13.692644
N 1.673167 0.833717 13.056476
O 2.870674 3.490421 10.076401
O 5.801988 -0.269274 11.824333
O 5.200810 1.421145 13.799876
C 2.293504 2.021048 12.801844
C 0.787464 2.257493 14.485299
H 0.229209 2.789022 15.251159
C 0.745099 0.959103 14.085675
H 0.144624 0.120721 14.428051
C 2.052301 4.296573 13.819958
C 1.433759 5.216280 12.947429
C 1.750543 6.570845 13.105423
H 1.281034 7.297178 12.435234
C 2.633815 7.023111 14.096318
C 3.193567 6.077850 14.964601
H 3.864076 6.413658 15.760870
C 2.911193 4.708622 14.856204
C 3.477431 3.734306 15.861893
H 2.722389 3.463975 16.621056
H 4.327590 4.179606 16.397696
H 3.814402 2.797213 15.396434
C 2.954110 8.492128 14.222516
H 3.493553 8.858281 13.332573
H 3.577445 8.699321 15.104455
H 2.034646 9.094214 14.307307
C 0.458297 4.775015 11.886414
H -0.094959 5.637331 11.488519
H -0.277058 4.055579 12.281623
H 0.990172 4.290107 11.051417
C 1.867251 -0.395748 12.327906
C 2.858624 -1.304745 12.738716
C 2.969377 -2.515117 12.034556
H 3.727429 -3.239122 12.348345
C 2.132224 -2.829974 10.959134
C 1.163691 -1.888985 10.575505
H 0.502648 -2.114520 9.733438
C 1.007775 -0.670216 11.242732
C -0.038717 0.323904 10.802722
H -0.613047 -0.065126 9.951045
H 0.417713 1.280589 10.498004
H -0.751862 0.553916 11.611043
C 2.240423 -4.152540 10.242924
H 1.394352 -4.810456 10.506602
H 3.167233 -4.684340 10.503196
H 2.213348 -4.020719 9.149577
C 3.807819 -1.021020 13.882513
H 4.073677 -1.971834 14.370633
H 3.332346 -0.393896 14.653384
C 6.908698 -0.846044 14.329593
C 8.068102 -1.286310 13.662105
H 8.114516 -1.247425 12.571057
C 9.166407 -1.770358 14.379226
H 10.059640 -2.107396 13.846789
C 9.123284 -1.823328 15.775845
H 9.982038 -2.202988 16.335661
C 7.979494 -1.391650 16.457108
H 7.942441 -1.434364 17.548695
C 6.883231 -0.907560 15.739365
H 5.997772 -0.574566 16.291321
C 5.296962 -0.242097 10.582535
C 5.769045 -1.191318 9.661871
H 6.511916 -1.918844 9.990854
C 5.271533 -1.173562 8.365563
H 5.625574 -1.901185 7.630973
C 4.311179 -0.215007 8.020432
H 3.885200 -0.163967 7.017420
C 3.910632 0.694761 8.987699
H 3.173323 1.468063 8.767746
C 5.910267 2.511542 13.440408
C 7.000614 2.955000 14.197265
H 7.308950 2.391610 15.078588
C 7.659385 4.111566 13.785348
H 8.516030 4.484811 14.352262
C 7.216303 4.783517 12.640364
H 7.709389 5.689203 12.283754
C 6.125431 4.271381 11.946004
H 5.748586 4.720283 11.024521
C 3.470779 4.079694 9.063570
C 2.715294 4.748119 8.064915
H 1.627830 4.783450 8.153959
C 3.384176 5.334694 6.999465
H 2.820495 5.852622 6.218044
C 4.785102 5.256626 6.931404
H 5.344605 5.703354 6.107408
C 5.442968 4.586347 7.959079
H 6.536870 4.502555 7.952408
